# Supplementary material
Source: PubMed Central journal article supplement (PMC2049018)
Supplement: bj4070303add.pdf [file bj4070303add.pdf]

**SUPPLEMENTAL DATA**

**Supplemental data Figure S1.**

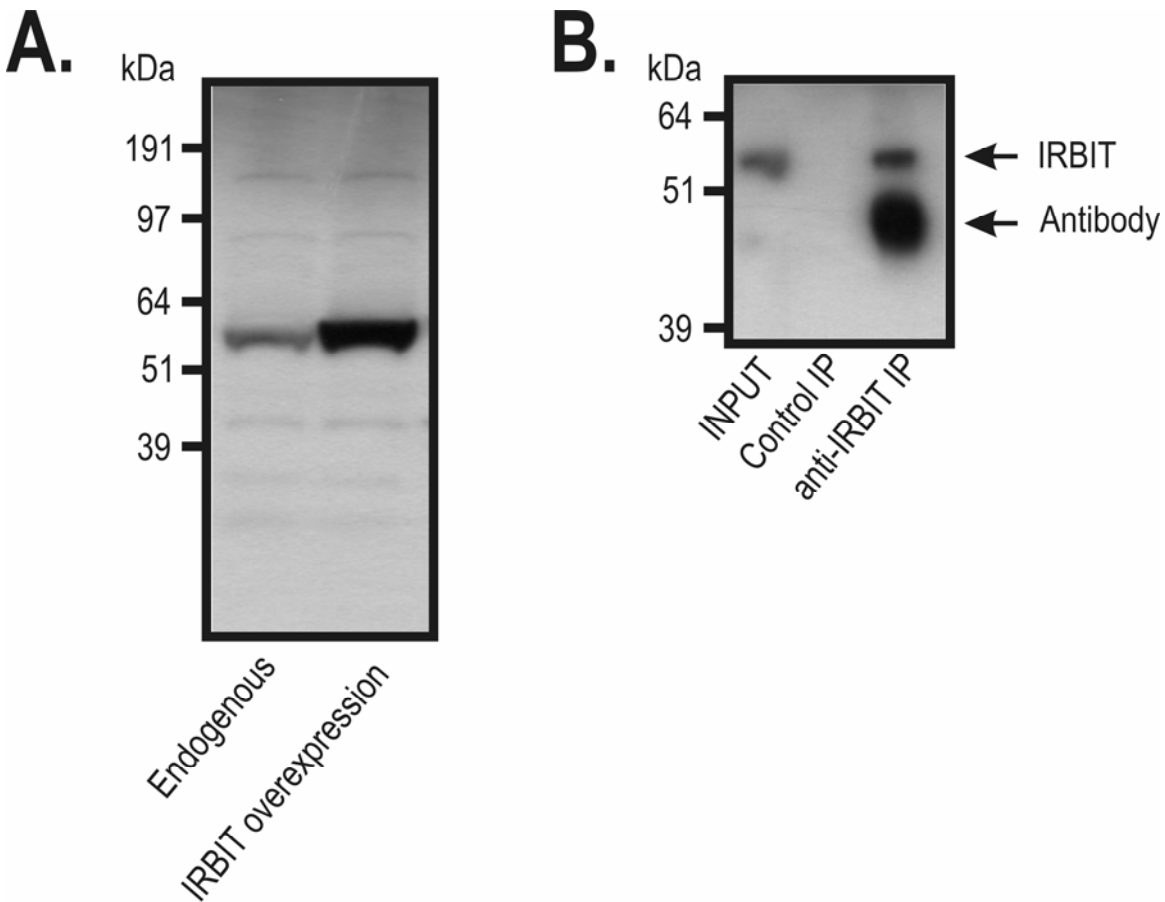

**Supplemental data Figure S1: Validation of the anti-IRBIT antibody.**

A, COS-1 cells were transfected with pTRACER-IRBIT. The whole cell lysate of the untransfected COS-1 cells (for endogenous IRBIT) or transfected cells (for overexpressed IRBIT) were analyzed by immunoblotting using the anti-IRBIT antibody.

B, COS-1 cells were lysed (INPUT) and endogenous IRBIT was immunoprecipitated using the anti-IRBIT antibody (anti-IRBIT IP). Immunoprecipitation in the absence of the antibody was used as a control (control IP). The positions of IRBIT and the immunoglobulin heavy chain of the anti-IRBIT antibody are indicated.

Supplemental data Figure S2

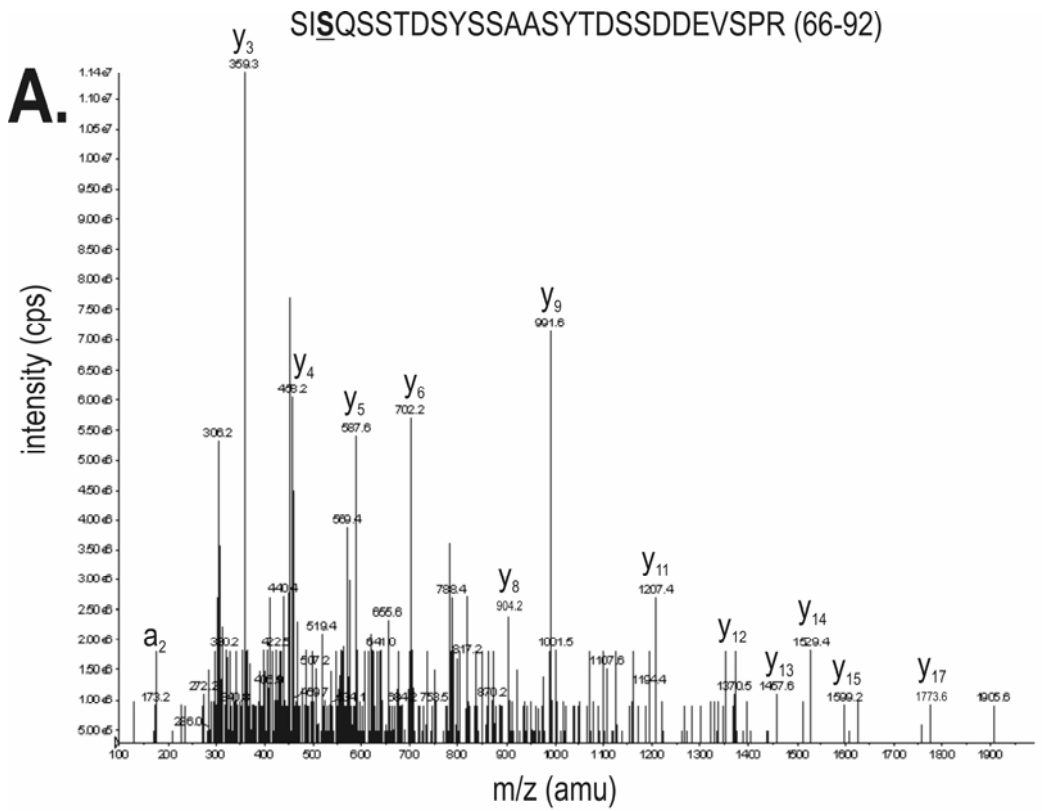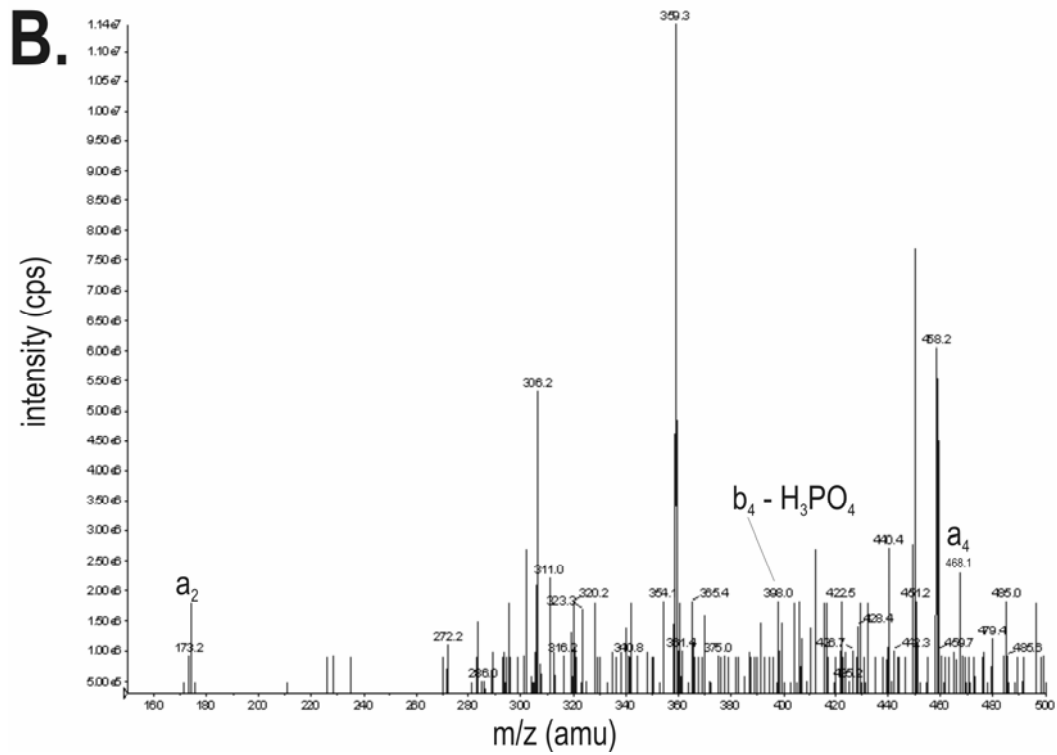

**Supplemental data Figure S2: Mass-spectrometric analysis of IRBIT phosphorylated by PKD.**

Purified GST-IRBIT-[1-104] was added to a reaction mixture containing 50 mM glycylglycine pH 7.5, 50  $\mu\text{g/ml}$  BSA and 20  $\mu\text{g/ml}$  PKD. Reaction was started by addition of a  $\text{Mg}^{2+}$ -ATP mixture (1 mM  $\text{MgCl}_2$ , 1 mM ATP) and reaction tubes were incubated for 2 h at 30 °C. Reaction was stopped by addition of 10 mM EDTA and incubation on ice. The samples were precipitated with 10 % trichloroacetic acid and the acetone-washed pellet was digested overnight with 250 ng trypsin in 200 mM ammonium bicarbonate. The resulting peptide mixture was analysed by a nano LC-MS/MS approach performed on a Dionex Ultimate capillary liquid chromatography system coupled to an Applied Biosystems 4000 QTRAP mass spectrometer. Peptides were separated on a PepMap C18 column developed with a 30 min linear gradient (0.1 % formic acid - 6 % acetonitrile - water to 0.1 % formic acid - 40 % acetonitrile - water). After pinpointing  $m/z$  values of potentially phosphorylated species of IRBIT-[66-92] by a precursor 79 (-) ion scan, we selected these ions for on-line collision-induced dissociation (CID) in a product (+) ion scan to determine the phosphorylated residue(s).

A product ion spectrum of the mono-phosphorylated form of IRBIT-[66-92] is shown. An  $a_2$  ion ( $m/z$  173) which corresponds to non-phosphorylated IRBIT-[66-67], together with both an  $a_4$  ion ( $m/z$  468) and a  $b_4$  ion having lost  $\text{H}_3\text{PO}_4$  ( $m/z$  398), corresponding to mono-phosphorylated IRBIT-[66-69], were found. These ions pinpointed Ser-68 as the phosphorylated residue. We could not detect a di-phosphorylated form of IRBIT-[66-92], indicating that Ser-68 was the only phosphorylated residue in this sample.

**Supplemental data Figure S3**

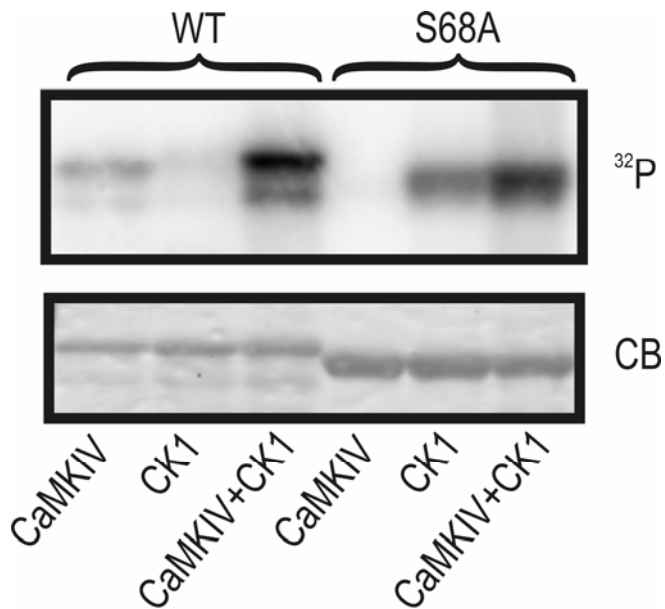

**Supplemental data Figure S3: Phosphorylation by CaMKIV on Ser-68 allows for subsequent phosphorylation by CK1.**

Purified GST-IRBIT-[1-104] (WT) or GST-IRBIT-[1-104]-[S68A] (S68A) was added to a reaction mixture containing 50 mM glycylglycine pH 7.5, 50  $\mu\text{g/ml}$  BSA, and 5  $\mu\text{g/ml}$  CaMKIV (Invitrogen Ltd) and/or 30  $\mu\text{g/ml}$  CK1. The phosphorylation reaction was started by addition of a  $\text{Mg}^{2+}$ - $[\gamma\text{-}^{32}\text{P}]\text{ATP}$  mixture giving a final concentration of 2 mM  $\text{MgCl}_2$  and 0.1 mM ATP (with 0.1  $\mu\text{Ci}/\mu\text{l}$   $[\gamma\text{-}^{32}\text{P}]\text{ATP}$ ) in the assay. After 1 h incubation at 30  $^\circ\text{C}$ , the reaction was stopped by addition of 10 mM EDTA. Samples were separated on a 10 % Bis-Tris NuPAGE<sup>®</sup> gel. After staining with Coomassie Blue, radioactivity was detected using phosphoscreens and the STORM 840 PhosphoImager (GE Healthcare). The autoradiogram (indicated as  $^{32}\text{P}$ ) or Coomassie Blue staining (indicated as CB) from a typical gel are shown ( $n = 3$ ).

Supplemental data Figure S4

SISQSSTDSYSSAASYTDSSDDEVSPR (66-92)

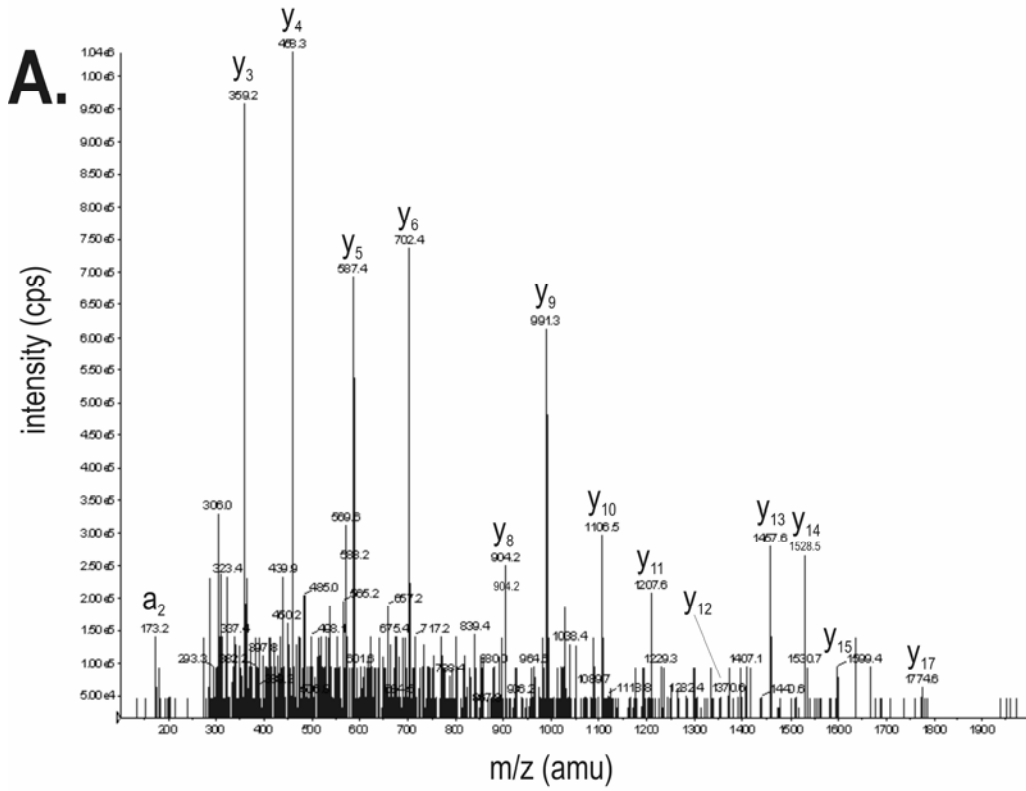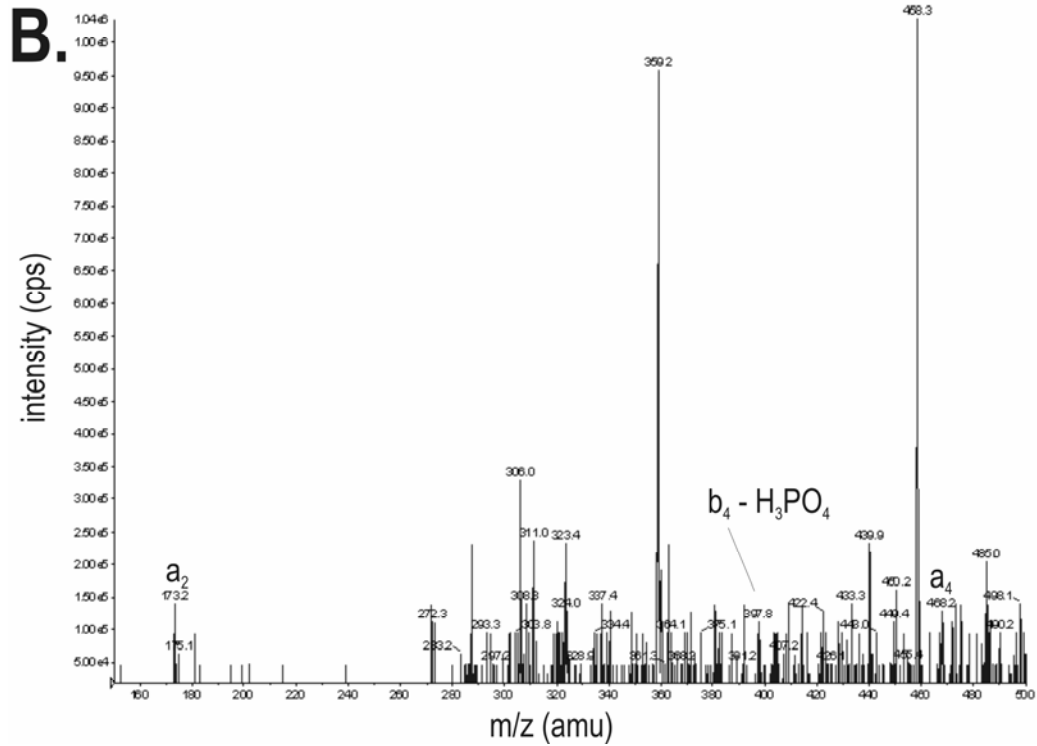

**Supplemental data Figure S4: Mass-spectrometric analysis of IRBIT phosphorylated by PKD and CK1 (mono-phosphorylated species).**

Sample was treated as described for Figure S2, except that GST-IRBIT-[1-104] was phosphorylated by both PKD and 30  $\mu\text{g/ml}$  CK1. A product ion spectrum of the mono-phosphorylated form of IRBIT-[66-92] is shown. As described for Figure S2, the presence of the ions  $a_2$  ( $m/z$  173),  $a_4$  ( $m/z$  468) and  $b_4$  which lost  $\text{H}_3\text{PO}_4$  ( $m/z$  398), pinpointed Ser-68 as the phosphorylated residue.

Supplemental data Figure S5

SISQSSSTDSYSSAASYTSSDDEVSPR (66-92)

A.

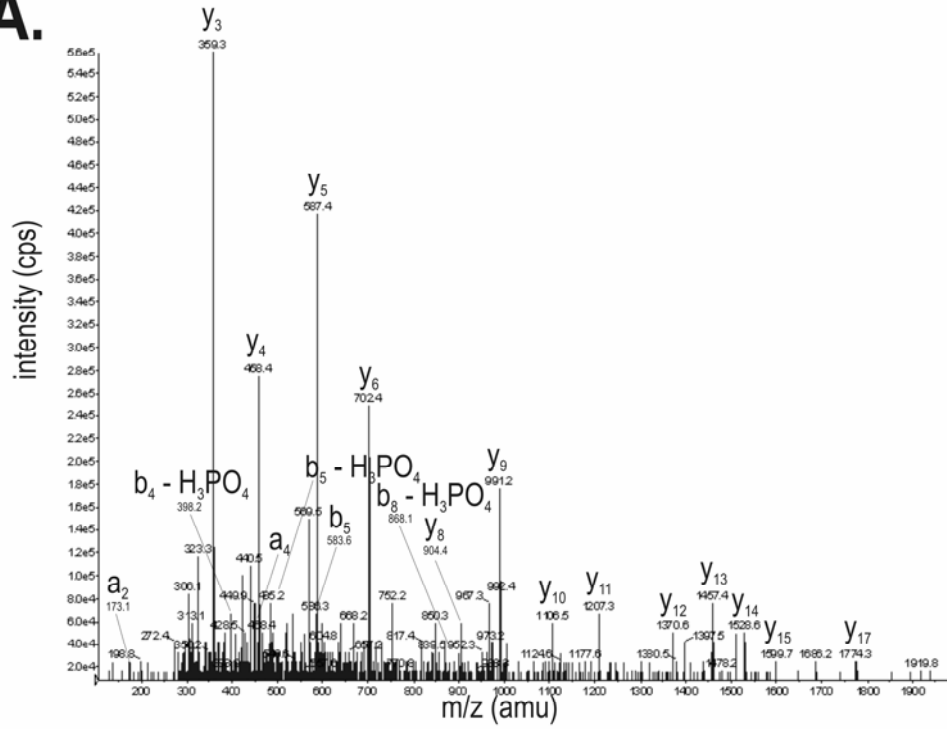

B.

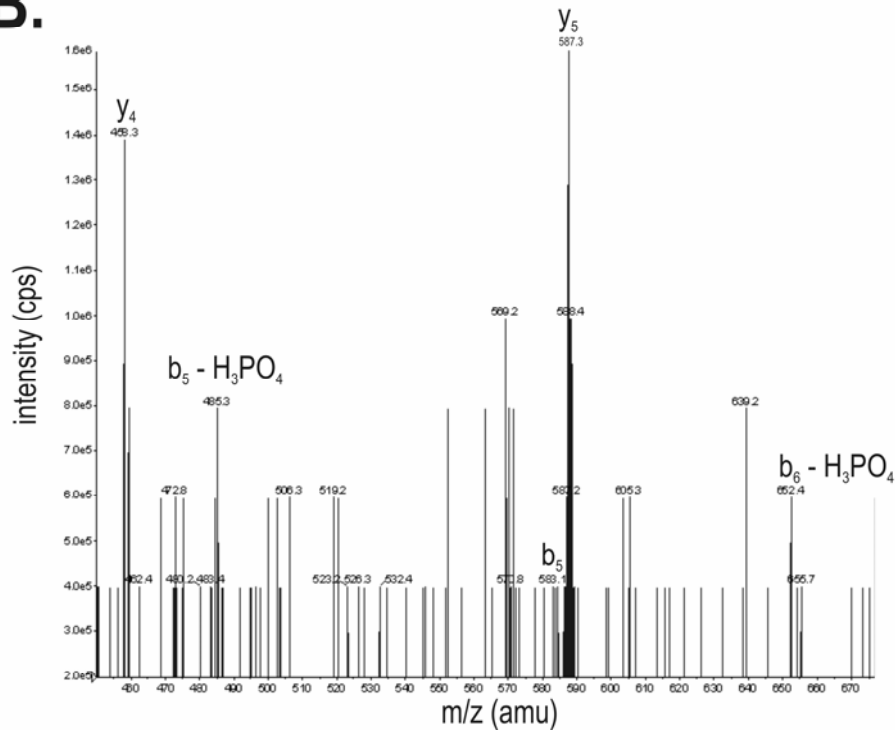

**Supplemental data Figure S5: Mass-spectrometric analysis of IRBIT phosphorylated by PKD and CK1 (di-phosphorylated species).**

Sample was treated as described for Figure S4. A product ion spectrum of the di-phosphorylated form of IRBIT-[66-92] is shown. The presence of the ions  $a_2$  ( $m/z$  173),  $a_4$  ( $m/z$  468) and  $b_4$  which lost  $H_3PO_4$  ( $m/z$  398), pinpointed Ser-68 as a phosphorylated residue. The presence of both a  $b_5$  ion ( $m/z$  583) and a  $b_5$  ion having lost  $H_3PO_4$  ( $m/z$  485), corresponding to mono-phosphorylated IRBIT-[66-70], together with a  $b_6$  ion having lost  $H_3PO_4$  ( $m/z$  652)), corresponding to di-phosphorylated IRBIT-[66-71], demonstrates that Ser-71 is the other phosphorylated residue in this species. The presence of a non-phosphorylated  $y_{17}$  ( $m/z$  1774) corresponding to IRBIT-[76-92]) indicated that IRBIT-[76-92] was not phosphorylated.



Supplemental data Figure S6

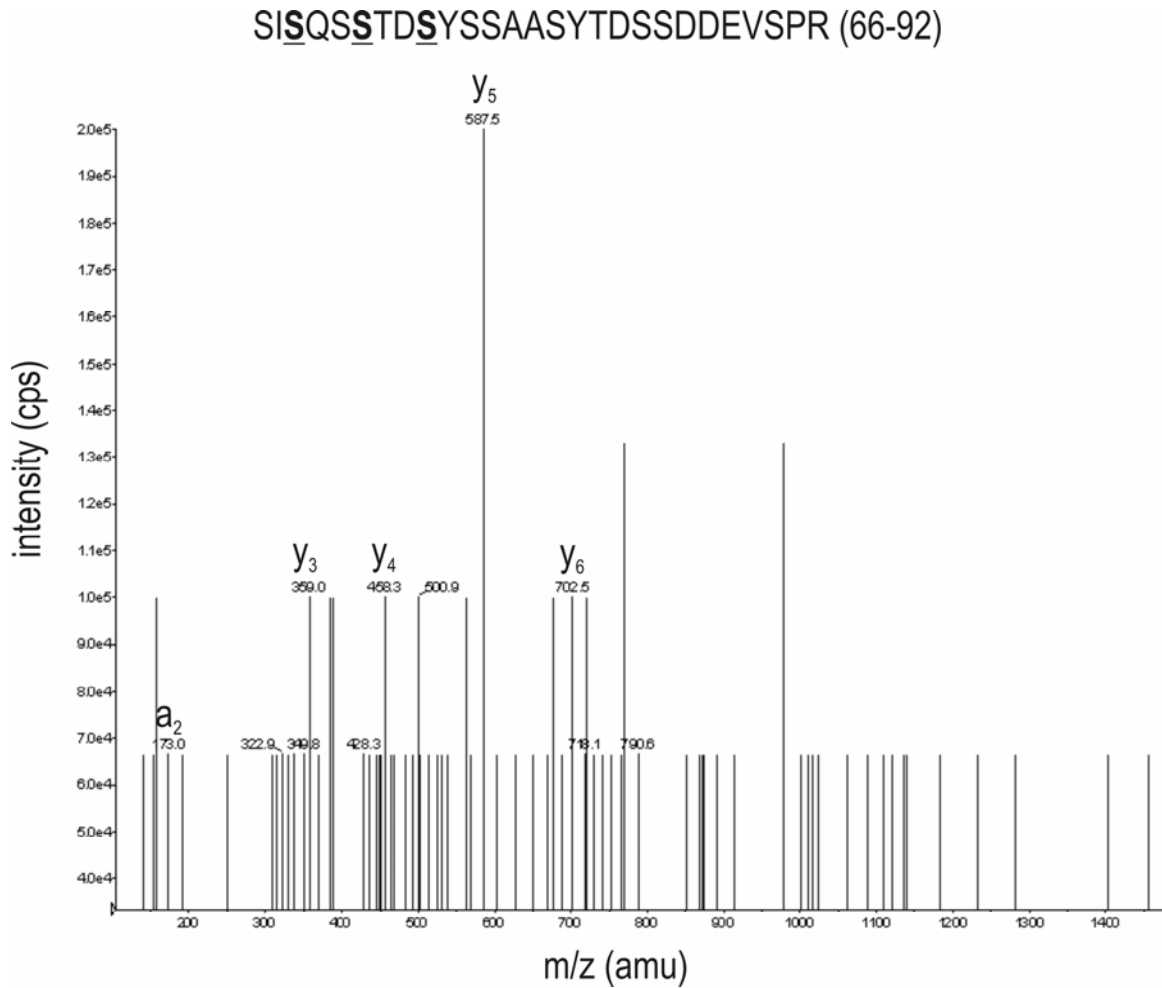

**Supplemental data Figure S6: Mass-spectrometric analysis of IRBIT phosphorylated by PKD and CK1 (tri-phosphorylated species).**

Sample was treated as described for Figure S4. A product ion spectrum of the tri-phosphorylated form of IRBIT-[66-92] is shown. In spite of its low abundance, this species produced a product ion spectrum with enough ions to confirm the identity. However, it did not allow us to assign phosphorylation sites.
